# Supplementary material for: Distribution of trivalent metal cations in alumino-/gallogermanate zeolites with JST topology
Source: Royal Society of Chemistry journal article supplement (doi:10.1039/c2dt31185b), 2012-01-01
Supplement: c2dt31185b.pdf [file c2dt31185b.pdf]

## **Electronic Supplementary Information**

# Distribution of trivalent metal cations in alumino-/gallogermanate zeolites with JST topology

**Yan Xu, Yi Li,\* Yide Han, Jihong Yu, Ruren Xu**

*State Key Laboratory of Inorganic Synthesis and Preparative Chemistry, College of Chemistry, Jilin*

*University, Changchun 130012, P. R. China, Fax: +86-431-85168609, Tel: +86-431-85168609, E-mail:*

*yili@jlu.edu.cn*

### Distribution of $\text{Be}^{2+}$ cations in Zeolite OSO

OSO is the first zeolite built exclusively of 3-rings (Fig. S1), the type material of which is OSB-1 ( $[\text{K}_6(\text{H}_2\text{O})_9][\text{Be}_3\text{Si}_6\text{O}_{18}]$ ).<sup>1</sup> The framework of OSO contains three crystallographically distinct T atom sites for  $\text{Be}^{2+}$  and Si, and their multiplicities are all the same. Two T1 and one T3 atoms form a 3-ring, and two T2 and one T3 form the other 3-ring. A pair of 3-rings form a spiro-5 building unit,<sup>2</sup> and each spiro-5 unit contains one T1 ( $2 \times 1/2$ ), one T2 ( $2 \times 1/2$ ), and one T3 atoms. Three spiro-5 units are connected with each other by sharing the vertex T1 and T2 atoms to form the complete unit cell of OSO. According to Pauling's third rule,  $\text{Be}^{2+}\text{-O-Be}^{2+}$  linkages in a tetrahedrally connected zeolite framework are energetically unfavourable. If every spiro-5 unit contains one  $\text{Be}^{2+}$  cation, there are four different distributions of one  $\text{Be}^{2+}$  cation in one spiro-5 unit. If the  $\text{Be}^{2+}$  cation only occupies T1 (Fig. S1b) or T2 site (Fig. S1c), the  $\text{Be}^{2+}\text{-O-Be}^{2+}$  linkage will be formed. Only when the  $\text{Be}^{2+}$  cation occupies T3 site (Fig. S1d) or half of the  $\text{Be}^{2+}$  cation occupies T1 and the other half occupies T2 site (Fig. S1e), the  $\text{Be}^{2+}\text{-O-Be}^{2+}$  linkage could be avoided. If one spiro-5 unit contains more than one  $\text{Be}^{2+}$  cation,  $\text{Be}^{2+}\text{-O-Be}^{2+}$  linkage would be unavoidable. Because each spiro-5 unit contains three T sites and three spiro-5 unit form the complete unit cell of OSO, the maximum  $\text{Be}^{2+}/\text{Si}$  ratio in OSO is 1/2. This result is in good agreement with the reported Be/Si ratio in OSB-1. Like in JST, the maximum content of  $\text{Be}^{2+}$  cations in zeolite OSO is determined by its unique structural feature.

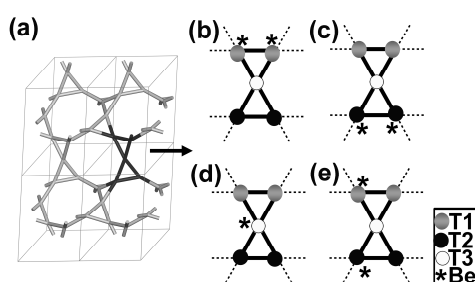

**Fig. S1** (a) The framework of zeolite OSO and (b)–(e) four different distributions of one  $\text{Be}^{2+}$  cation in one spiro-5 unit. All oxygen atoms are omitted for clarity.

### References:

- 1 A. K. Cheetham, H. Fjellvåg, T. E. Gier, K. O. Kongshaug, K. P. Lillerud and G. D. Stucky, *Stud. Surf. Sci. Catal.*, 2001, **135**, 158.
- 2 C. Baerlocher, L. B. McCusker, D. H. Olson, *Atlas of Zeolite Framework Types*, 6th ed., Elsevier, Amsterdam, 2007; see also: <http://www.iza-structure.org/databases/>.

**Table S1.** Atomic coordinates ( $\times 10^4$ ), site occupancies, and equivalent isotropic displacement parameters ( $\text{\AA}^2 \times 10^3$ ) for compound **1**<sup>a</sup>

| atoms | x       | y       | z       | Occ.       | U(eq) |
|-------|---------|---------|---------|------------|-------|
| Ge(1) | 8412(1) | 664(1)  | 774(1)  | 0.6789(18) | 16(1) |
| Al(1) | 8412(1) | 664(1)  | 774(1)  | 0.3211(18) | 16(1) |
| Ge(2) | 8616(1) | 2568(1) | 888(1)  | 0.6545(18) | 14(1) |
| Al(2) | 8616(1) | 2568(1) | 888(1)  | 0.3455(18) | 14(1) |
| O(1)  | 8193(2) | 1629(1) | 1169(2) | 1          | 25(1) |
| O(2)  | 9253(2) | 2880(2) | 1680(2) | 1          | 25(1) |
| O(3)  | 9216(2) | 242(2)  | 1326(2) | 1          | 25(1) |
| O(4)  | 7568(2) | 21(2)   | 855(2)  | 1          | 26(1) |
| Ni(1) | 1664(1) | 1664(1) | 1664(1) | 1          | 22(1) |
| N(1)  | 1823(2) | 405(2)  | 1525(2) | 1          | 35(1) |
| N(2)  | 1626(4) | 2967(3) | 1618(3) | 1          | 60(1) |
| C(1)  | 1392(5) | 2679(4) | 207(4)  | 1          | 80(2) |
| C(2)  | 1549(6) | 3202(4) | 812(5)  | 1          | 97(2) |

<sup>a</sup>  $U(\text{eq})$  is defined as one third of the trace of the orthogonalized  $U_{ij}$  tensor.

**Table S2.** Atomic coordinates ( $\times 10^4$ ), site occupancies, and equivalent isotropic displacement parameters ( $\text{\AA}^2 \times 10^3$ ) for compound **2**<sup>a</sup>

| atoms | x       | y       | z       | Occ.     | U(eq) |
|-------|---------|---------|---------|----------|-------|
| Ge(1) | 4359(1) | 9214(1) | 3415(1) | 0.671(2) | 14(1) |
| Al(1) | 4359(1) | 9214(1) | 3415(1) | 0.329(2) | 14(1) |
| Ge(2) | 2456(1) | 9084(1) | 3599(1) | 0.662(2) | 13(1) |
| Al(2) | 2456(1) | 9084(1) | 3599(1) | 0.338(2) | 13(1) |
| Co(1) | 1672(1) | 1672(1) | 1672(1) | 1        | 24(1) |
| O(1)  | 3399(2) | 8813(2) | 3182(2) | 1        | 23(1) |
| O(2)  | 4772(2) | 8667(2) | 4226(2) | 1        | 24(1) |
| O(3)  | 5012(2) | 9135(2) | 2582(2) | 1        | 25(1) |
| O(4)  | 1713(2) | 9226(2) | 2857(2) | 1        | 23(1) |
| N(1)  | 1511(3) | 1850(3) | 390(2)  | 1        | 37(1) |
| N(2)  | 1656(5) | 2997(3) | 1595(3) | 1        | 75(2) |
| C(1)  | 1387(6) | 2697(4) | 200(4)  | 1        | 82(3) |
| C(2)  | 1518(8) | 3211(5) | 813(6)  | 1        | 99(3) |

<sup>a</sup>  $U(\text{eq})$  is defined as one third of the trace of the orthogonalized  $U_{ij}$  tensor.

**Table S3.** Atomic coordinates ( $\times 10^4$ ) and equivalent isotropic displacement parameters ( $\text{\AA}^2 \times 10^3$ ) for compound **3**<sup>a</sup>

| atoms | x       | y       | z       | U(eq)  |
|-------|---------|---------|---------|--------|
| Ga(1) | 8410(1) | 663(1)  | 772(1)  | 18(1)  |
| Ge(1) | 8410(1) | 663(1)  | 772(1)  | 18(1)  |
| Ga(2) | 8614(1) | 2566(1) | 888(1)  | 17(1)  |
| Ge(2) | 8614(1) | 2566(1) | 888(1)  | 17(1)  |
| Co(1) | 1671(1) | 1671(1) | 1671(1) | 25(1)  |
| O(1)  | 7560(2) | 21(2)   | 848(2)  | 33(1)  |
| O(2)  | 8674(2) | 779(2)  | -255(2) | 29(1)  |
| O(3)  | 8174(2) | 1633(2) | 1167(2) | 29(1)  |
| O(4)  | 9262(2) | 2872(2) | 1683(2) | 32(1)  |
| C(1)  | 208(4)  | 1374(7) | 2684(4) | 87(3)  |
| C(2)  | 825(5)  | 1586(7) | 3196(5) | 100(3) |
| N(1)  | 1846(3) | 399(3)  | 1520(3) | 39(1)  |
| N(2)  | 1588(3) | 1663(5) | 2995(3) | 81(2)  |

<sup>a</sup>  $U(\text{eq})$  is defined as one third of the trace of the orthogonalized  $U_{ij}$  tensor.

**Table S4.** Atomic coordinates ( $\times 10^4$ ) and equivalent isotropic displacement parameters ( $\text{\AA}^2 \times 10^3$ ) for compound **4**<sup>a</sup>

| atoms | x        | y       | z        | U(eq)  |
|-------|----------|---------|----------|--------|
| Ga(1) | 8411(1)  | 656(1)  | 776(1)   | 17(1)  |
| Ge(1) | 8411(1)  | 656(1)  | 776(1)   | 17(1)  |
| Ga(2) | 8607(1)  | 2558(1) | 898(1)   | 16(1)  |
| Ge(2) | 8607(1)  | 2558(1) | 898(1)   | 16(1)  |
| Zn(1) | 11672(1) | 1672(1) | 1672(1)  | 29(1)  |
| O(1)  | 7565(3)  | 8(3)    | 848(3)   | 33(1)  |
| O(2)  | 8672(3)  | 775(3)  | -247(3)  | 28(1)  |
| O(3)  | 8167(3)  | 1618(3) | 1173(3)  | 29(1)  |
| O(4)  | 7866(3)  | 3301(3) | 750(3)   | 30(1)  |
| N(1)  | 13003(5) | 1599(5) | 1702(7)  | 85(3)  |
| N(2)  | 11858(4) | 394(4)  | 1509(4)  | 47(2)  |
| C(1)  | 13210(7) | 840(7)  | 1558(10) | 105(3) |
| C(2)  | 12683(6) | 205(6)  | 1351(8)  | 80(3)  |

<sup>a</sup>  $U(\text{eq})$  is defined as one third of the trace of the orthogonalized  $U_{ij}$  tensor.

**Table S5.** Selected bond lengths (Å) and angles (deg) for compound **1**<sup>a</sup>

|                    |            |                    |            |
|--------------------|------------|--------------------|------------|
| Ge(1)-O(3) #1      | 1.737(2)   | Ge(2)-O(1)         | 1.754(2)   |
| Ge(1)-O(3)         | 1.747(2)   | O(2)-Al(2)#3       | 1.745(2)   |
| Ge(1)-O(4)         | 1.748(2)   | O(2)-Ge(2)#3       | 1.745(2)   |
| Ge(1)-O(1)         | 1.753(2)   | O(3)-Al(1)#4       | 1.737(2)   |
| Ge(2)-O(4)#1       | 1.744(2)   | O(3)-Ge(1)#4       | 1.737(2)   |
| Ge(2)-O(2)#2       | 1.745(2)   | O(4)-Al(2)#4       | 1.744(2)   |
| Ge(2)-O(2)         | 1.749(2)   | O(4)-Ge(2)#4       | 1.744(2)   |
| Ge(1)-O(1)-Ge(2)   | 128.21(15) | Al(1)#4-O(3)-Ge(1) | 126.66(14) |
| Al(2)#3-O(2)-Ge(2) | 130.66(15) | Ge(1)#4-O(3)-Ge(1) | 126.66(14) |
| Ge(2)#3-O(2)-Ge(2) | 130.66(15) |                    |            |

<sup>a</sup> Symmetry transformations used to generate equivalent atoms: (#1)  $-z + 1, -x + 1, -y$ ; (#2)  $y + 1/2, -z + 1/2, -x + 1$ ; (#3)  $-z + 1, x - 1/2, -y + 1/2$ ; (#4)  $-y + 1, -z, -x + 1$ .

**Table S6.** Selected bond lengths (Å) and angles (deg) for compound **2**<sup>a</sup>

|                    |            |                    |            |
|--------------------|------------|--------------------|------------|
| Ge(1)-O(2)#1       | 1.736(3)   | Ge(2)-O(1)         | 1.757(3)   |
| Ge(1)-O(2)         | 1.749(3)   | O(2)-Al(1)#3       | 1.736(3)   |
| Ge(1)-O(3)         | 1.749(3)   | O(2)-Ge(1)#3       | 1.736(3)   |
| Ge(1)-O(1)         | 1.756(3)   | O(3)-Al(2)#3       | 1.744(3)   |
| Ge(2)-O(3)#1       | 1.744(3)   | O(3)-Ge(2)#3       | 1.744(3)   |
| Ge(2)-O(4)         | 1.746(3)   | O(4)-Al(2)#4       | 1.748(3)   |
| Ge(2)-O(4)#2       | 1.748(3)   | O(4)-Ge(2)#4       | 1.748(3)   |
| Ge(1)-O(1)-Ge(2)   | 128.01(18) | Al(2)#3-O(3)-Ge(1) | 131.05(17) |
| Al(1)#3-O(2)-Ge(1) | 126.45(17) | Ge(2)#3-O(3)-Ge(1) | 131.05(17) |
| Ge(1)#3-O(2)-Ge(1) | 126.45(17) | Ge(2)-O(4)-Al(2)#4 | 130.77(18) |
| Ge(2)-O(4)-Ge(2)#4 | 130.77(18) |                    |            |

<sup>a</sup> Symmetry transformations used to generate equivalent atoms: (#1)  $z, -x + 3/2, y - 1/2$ ; (#2)  $-z + 1/2, -x + 1, y - 1/2$ ; (#3)  $-y + 3/2, z + 1/2, x$ ; (#4)  $-y + 1, z + 1/2, -x + 1/2$ .

**Table S7.** Selected bond lengths (Å) and angles (deg) for compound **3**<sup>a</sup>

|                    |            |                    |            |
|--------------------|------------|--------------------|------------|
| Ga(1)-O(2)#1       | 1.765(3)   | Ga(2)-O(4)         | 1.776(3)   |
| Ga(1)-O(2)         | 1.769(3)   | O(1)-Ge(2)#1       | 1.765(3)   |
| Ga(1)-O(1)         | 1.771(3)   | O(1)-Ga(2)#1       | 1.765(3)   |
| Ga(1)-O(3)         | 1.781(3)   | O(2)-Ge(1)#2       | 1.765(3)   |
| Ga(2)-O(1)#2       | 1.765(3)   | O(2)-Ga(1)#2       | 1.765(3)   |
| Ga(2)-O(4)#3       | 1.768(3)   | O(4)-Ge(2)#4       | 1.768(3)   |
| Ga(2)-O(3)         | 1.772(3)   | O(4)-Ga(2)#4       | 1.768(3)   |
| Ge(2)#1-O(1)-Ga(1) | 130.13(18) | Ga(2)-O(3)-Ga(1)   | 127.04(18) |
| Ga(2)#1-O(1)-Ga(1) | 130.13(18) | Ge(2)#4-O(4)-Ga(2) | 129.58(18) |
| Ge(1)#2-O(2)-Ga(1) | 125.55(17) | Ga(2)#4-O(4)-Ga(2) | 129.58(18) |
| Ga(1)#2-O(2)-Ga(1) | 125.55(17) |                    |            |

<sup>a</sup> Symmetry transformations used to generate equivalent atoms: (#1)  $-y + 1, -z, -x + 1$ ; (#2)  $-z + 1, -x + 1, -y$ ; (#3)  $y + 1/2, -z + 1/2, -x + 1$ ; (#4)  $-z + 1, x - 1/2, -y + 1/2$ .

**Table S8.** Selected bond lengths (Å) and angles (deg) for compound **4**<sup>a</sup>

|                    |          |                    |          |
|--------------------|----------|--------------------|----------|
| Ga(1)-O(2)         | 1.759(4) | Ga(2)-O(3)         | 1.778(4) |
| Ga(1)-O(2)#1       | 1.766(4) | O(1)-Ge(2)#1       | 1.764(4) |
| Ga(1)-O(1)         | 1.768(4) | O(1)-Ga(2)#1       | 1.764(4) |
| Ga(1)-O(3)         | 1.771(4) | O(2)-Ge(1)#2       | 1.766(4) |
| Ga(2)-O(4)         | 1.755(4) | O(2)-Ga(1)#2       | 1.766(4) |
| Ga(2)-O(1)#2       | 1.764(4) | O(4)-Ge(2)#4       | 1.776(4) |
| Ga(2)-O(4)#3       | 1.776(4) | O(4)-Ga(2)#4       | 1.776(4) |
| Ge(2)#1-O(1)-Ga(1) | 130.0(2) | Ga(1)-O(3)-Ga(2)   | 126.8(3) |
| Ga(2)#1-O(1)-Ga(1) | 130.0(2) | Ga(2)-O(4)-Ge(2)#4 | 129.8(3) |
| Ga(1)-O(2)-Ge(1)#2 | 125.6(2) | Ga(2)-O(4)-Ga(2)#4 | 129.8(3) |
| Ga(1)-O(2)-Ga(1)#2 | 125.6(2) |                    |          |

<sup>a</sup> Symmetry transformations used to generate equivalent atoms: (#1)  $-y + 1, -z, -x + 1$ ; (#2)  $-z + 1, -x + 1, -y$ ; (#3)  $-z + 1, x - 1/2, -y + 1/2$ ; (#4)  $y + 1/2, -z + 1/2, -x + 1$ .

**Table S9.** The hydrogen bonds for compound 1

| D-H...A          | d(D...A) | <(DHA) |
|------------------|----------|--------|
| N(1)-H(1)...O(2) | 2.934    | 154.63 |
| N(1)-H(1)...O(3) | 2.991    | 144.95 |
| N(2)-H(2)...O(1) | 2.955    | 112.54 |

**Table S10.** The hydrogen bonds for compound 2

| D-H...A          | d(D...A) | <(DHA) |
|------------------|----------|--------|
| N(1)-H(1)...O(4) | 2.940    | 154.55 |
| N(1)-H(2)...O(2) | 2.979    | 146.15 |
| N(2)-H(1)...O(1) | 2.942    | 120.15 |

**Table S11.** The hydrogen bonds for compound 3

| D-H...A          | d(D...A) | <(DHA) |
|------------------|----------|--------|
| N(1)-H(1)...O(4) | 2.944    | 157.11 |
| N(1)-H(1)...O(2) | 2.995    | 145.38 |
| N(2)-H(2)...O(3) | 2.977    | 115.12 |

**Table S12.** The hydrogen bonds for compound 4

| D-H...A          | d(D...A) | <(DHA) |
|------------------|----------|--------|
| N(1)-H(1)...O(4) | 2.944    | 157.11 |
| N(1)-H(1)...O(2) | 2.995    | 145.38 |
| N(2)-H(2)...O(3) | 2.977    | 115.12 |
